# Supplementary material for: Single-molecule studies contrast ordered DNA replication with stochastic translesion synthesis
Source: eLife. 2017 Dec 6;6:e32177. doi: 10.7554/eLife.32177 (PMC5731819; doi:10.7554/eLife.32177)
Supplement: Source data 1. [file elife-32177-data1.xlsx]

## Sheet: Figure 2
Individual lifetimes used to construct histograms
2B	2C	2D	2D	2F	2H	2I	2K	2L
Lag time (Loader arrival - clamp arrival) (s)	Clamp lifetime (s)	Loader lifetime (loader alone) (s)	Loader lifetime (during loading) (s)	Clamp lifetime ATPγS (s)	Loader lifetime during unloading (s)	Lag time (Loader arrival - clamp release) (s)	Loader lifetime during unloading (s) no ATP	Lag time (Loader arrival - clamp release) (s) no ATP
N = 81	N = 118	N = 95	N = 48	N = 63	N = 30	N = 30	N = 39	N = 39
0	3752.48	5.332	2.666	3.08	21.56	11	5.72	0.44
0	1696.6	4.472	0.258	8.36	5.72	5.28	36.52	2.64
0	439.12	0.516	0.086	36.08	12.32	2.64	8.8	8.36
0	3522.94	0.258	0.86	12.76	4.4	3.08	11.44	8.36
0	1836.32	2.408	0.43	2.64	7.48	2.2	16.28	11
0.44	3852.28	2.408	0.086	16.28	18.92	6.6	14.08	1.32
0	808.38	2.15	0.774	2.2	9.24	7.48	3.96	1.76
0	628.74	1.118	19.952	20.68	3.96	0.88	6.6	0.88
0.44	2235.52	0.516	0.172	43.12	2.2	0.88	8.8	7.92
0	798.4	3.87	0.344	1.76	51.04	44.44	5.72	0
0	159.68	1.634	0.258	2.2	13.64	9.24	3.08	2.2
0	998	1.032	0.086	7.48	7.92	5.28	7.48	5.28
0	1257.48	2.064	0.516	0.88	10.12	4.84	1.76	0.44
0.44	1746.5	8.428	0.344	0.88	4.84	1.32	1.76	0.44
0.44	4141.7	3.01	0.946	1.76	9.24	1.32	2.2	0.88
0	3143.7	8.342	0.172	0.88	9.68	9.24	37.84	9.68
0	269.46	0.86	0.602	0.88	7.92	4.4	8.36	5.28
0	39.92	3.956	0.086	9.24	3.52	2.2	10.56	6.6
0.44	598.8	2.236	0.086	2.2	1.76	1.32	0.88	0.44
0	1447.1	0.344	0.344	0.88	2.64	0.44	44.88	8.36
0	99.8	0.344	0.086	5.72	2.2	1.76	4.84	0.44
0	788.42	14.964	0.258	53.68	37.84	30.36	16.72	7.92
0	229.54	10.492	0.688	0.88	1.76	0.44	14.52	1.76
0	1447.1	0.43	0.086	0.88	17.16	7.48	6.6	3.08
0	1287.42	2.322	0.172	2.2	18.92	1.32	3.52	1.76
0.44	399.2	0.688	7.654	18.04	18.92	14.08	41.8	13.2
0	69.86	2.064	0.172	14.52	33.88	25.08	8.8	0.44
0	359.28	0.516	0.172	0.88	18.92	12.76	67.32	9.68
0.44	3502.98	1.978	1.634	0.88	1.76	0.88	24.2	2.64
0.44	259.48	0.344	0.258	12.32	0.88	0	9.68	4.84
0	1846.3	0.344	0.86	3.96			38.28	3.08
0	1457.08	0.688	0.688	0.44			7.48	0
0	1437.12	2.15	0.172	6.16			68.2	36.08
0.44	39.92	0.172	0.258	0.44			3.08	0.44
0	59.88	0.602	20.296	7.04			15.84	1.76
0	538.92	0.946	0.43	2.2			18.04	0
0	119.76	2.408	3.354	0.44			11.88	3.96
0	29.94	1.548	0.172	0.88			31.68	28.16
0.44	4091.8	1.462	0.086	1.32			7.04	5.72
0	259.48	2.236	11.438	0.88
0	1506.98	0.43	0.774	28.16
0.44	1896.2	2.838	0.258	22.88
0	828.34	0.258	0.258	2.2
0.44	1327.34	0.258	0.344	2.2
0	3952.08	0.172	0.602	1.32
0	279.44	1.462	4.3	0.44
0	2614.76	3.01	0.172	13.2
0.44	369.26	10.406	1.118	1.76
0	109.78	0.258		0.88
0	429.14	0.344		0.88
0.44	319.36	1.118		0.88
0.44	1067.86	2.236		15.84
0.44	2704.58	0.258		2.64
0.44	249.5	0.602		16.28
0	3383.22	0.344		2.2
0	2914.16	5.246		2.64
0.44	1147.7	0.172		0.88
0.44	1497	0.344		3.08
0	2724.54	1.29		0.88
0	2405.18	0.172		4.4
0	139.72	0.172		0.88
0.44	1686.62	6.278		2.64
0	688.62	0.172		3.52
0.44	2744.5	8.6
0	638.72	5.848
0	1157.68	0.774
0.44	1277.44	1.462
0.44	1057.88	1.892
0	4141.7	8.772
0	459.08	0.258
0	3812.36	0.172
0	1157.68	0.258
0.44	1287.42	0.258
0	1297.4	0.258
0.44	269.46	11.782
0	3153.68	3.956
0	3512.96	1.032
0	449.1	0.516
0.44	419.16	0.344
0.44	658.68	0.688
0	618.76	0.688
	2694.6	0.946
	1077.84	1.29
	1746.5	0.774
	189.62	0.602
	1167.66	2.064
	638.72	0.602
	19.96	5.934
	2265.46	0.86
	1606.78	9.116
	3343.3	1.978
	49.9	0.516
	4131.72	7.052
	848.3	0.43
	279.44	0.258
	1816.36
	2634.72
	3662.66
	718.56
	219.56
	798.4
	169.66
	728.54
	1187.62
	59.88
	2125.74
	538.92
	99.8
	409.18
	2944.1
	4141.7
	189.62
	2215.56
	2255.48
	1846.3
	339.32
	3682.62
	2175.64

## Sheet: Figure 3
Individual lifetimes used to construct histograms
3B	3D	3F	3G	3I
Pol IIIcore lifetime (s)	Pol I lifetime (s)	Pol IIIcore lifetime on clamp (s)	Pol IIIcore lifetime on clamp + dATP/dTTP (s)	Tau complex lifetime (s)
N = 44	N = 157	N = 53	N = 43	N = 42
0.086	25.74	9.24	5.94	30.36
0.086	11.22	13.86	14.52	15.18
0.086	19.14	25.74	33.66	75.24
0.086	64.68	11.88	12.54	9.24
0.086	29.7	4.62	7.26	2.64
23.736	10.56	5.94	20.46	7.92
0.086	30.36	71.94	8.58	13.2
0.086	246.18	3.3	5.94	120.12
30.616	51.48	16.5	26.4	25.74
0.172	10.56	13.86	11.22	3.3
0.086	33.66	34.98	2.64	5.94
0.172	20.46	8.58	5.94	17.16
0.172	49.5	108.24	4.62	3.96
11.266	58.74	3.96	15.84	3.3
2.408	11.22	11.88	11.88	3.3
0.086	25.74	12.54	25.74	15.84
0.172	9.9	6.6	50.82	5.94
4.3	0.66	14.52	11.22	18.48
28.208	85.8	11.88	27.06	7.92
0.086	124.08	110.88	9.24	22.44
0.172	65.34	11.88	29.7	2.64
0.086	21.78	3.3	2.64	25.08
0.43	29.7	7.26	67.98	5.28
34.228	7.26	9.9	5.94	1.98
0.086	13.86	2.64	9.9	52.14
5.504	50.16	29.04	2.64	19.8
0.344	12.54	33	5.94	9.24
0.086	28.38	9.9	13.2	186.78
0.086	108.9	11.88	9.9	34.32
0.086	74.58	10.56	13.2	44.22
0.086	0.66	69.96	35.64	4.62
2.666	38.94	46.2	17.82	16.5
0.086	66	21.78	3.3	1.98
0.086	25.74	14.52	3.3	17.16
1.978	35.64	5.28	9.9	4.62
0.86	41.58	10.56	14.52	3.96
0.946	139.26	7.92	128.04	36.96
0.344	20.46	1.32	40.92	5.28
0.086	15.18	1.98	19.14	23.76
0.086	7.26	141.9	7.92	15.84
2.752	60.72	2.64	4.62	31.02
0.258	3.96	3.96	62.04	12.54
0.086	26.4	21.12	18.48
0.086	58.74	8.58
	242.88	12.54
	54.78	11.88
	49.5	56.1
	52.14	5.28
	12.54	5.28
	60.72	5.94
	6.6	3.3
	1.98	31.02
	7.26	26.4
	150.48
	58.08
	0.66
	0.66
	110.22
	26.4
	64.02
	38.94
	13.86
	98.34
	1.32
	26.4
	16.5
	44.88
	164.34
	9.24
	83.82
	0.66
	9.24
	64.02
	42.9
	29.7
	75.9
	0.66
	109.56
	31.68
	56.76
	12.54
	184.8
	69.96
	95.04
	95.04
	24.42
	23.1
	26.4
	37.62
	6.6
	2.64
	21.12
	33.66
	53.46
	1.98
	0.66
	56.1
	25.74
	1.98
	48.18
	21.12
	13.2
	1.98
	51.48
	10.56
	128.7
	2.64
	3.3
	44.88
	300.3
	67.98
	13.86
	6.6
	28.38
	48.84
	48.18
	15.84
	25.74
	17.16
	13.86
	28.38
	16.5
	9.24
	19.14
	8.58
	3.3
	34.32
	21.12
	118.14
	13.2
	31.02
	143.88
	0.66
	4.62
	47.52
	17.82
	25.08
	17.16
	34.98
	143.88
	1.32
	46.86
	15.18
	21.78
	27.72
	23.76
	186.78
	107.58
	40.92
	1.98
	25.08
	4.62
	25.74
	95.7
	33
	48.18
	85.14

## Sheet: Figure 4
Individual lifetimes used to construct histograms
4B	4E	4G	4I
Pol IV lifetime (s)	Pol IIIcore-Pol IV colocalization (s)	Pol IIIα-ε colocalization (s)	Pol II lifetime (s)
N = 148	N = 30	N = 32	N = 73
33.66	19.8	56.1	11.88
63.36	8.58	17.82	9.24
5.28	23.1	13.2	5.28
9.24	5.94	6.6	102.96
183.48	7.26	13.86	3.3
161.04	16.5	4.62	8.58
260.7	7.92	39.6	31.68
34.98	2.64	20.46	9.9
27.06	42.9	32.34	3.3
18.48	2.64	5.28	44.88
69.3	29.04	30.36	81.84
243.54	19.14	5.94	36.96
51.48	11.88	18.48	38.28
5.28	157.08	11.22	331.32
4.62	2.64	2.64	2.64
29.04	5.94	3.96	10.56
3.3	2.64	6.6	9.9
5.28	7.26	27.72	27.72
3.3	2.64	11.22	1.98
14.52	1.98	45.54	5.94
42.24	15.18	5.94	1.98
9.9	10.56	4.62	9.24
15.18	17.16	50.16	58.74
140.58	5.94	17.82	143.88
16.5	2.64	11.88	145.2
132.66	5.28	3.3	81.18
7.26	2.64	20.46	66
3.96	1.98	11.88	10.56
3.3	11.88	3.96	2.64
7.92	3.3	10.56	60.06
105.6		5.28	40.92
178.86		35.64	52.14
21.12			67.32
8.58			206.58
9.24			182.82
60.72			166.32
5.28			259.38
9.24			31.68
8.58			77.88
55.44			16.5
81.18			3.3
29.04			1.98
3.3			71.94
30.36			38.94
77.22			2.64
71.28			1.98
45.54			3.3
5.94			128.7
7.92			25.08
42.24			5.94
6.6			138.6
2.64			32.34
5.28			8.58
130.02			12.54
38.94			21.78
29.7			1.98
61.38			44.88
77.22			6.6
11.88			5.28
9.24			4.62
3.96			85.8
63.36			1.98
46.2			1.98
10.56			1.98
42.24			30.36
5.28			13.86
74.58			74.58
9.24			38.94
5.28			3.96
3.96			31.68
13.86			125.4
2.64			25.74
47.52			16.5
91.08
5.28
75.9
7.92
21.12
40.92
38.94
63.36
26.4
11.22
40.92
69.3
3.3
12.54
74.58
95.7
11.88
28.38
6.6
11.88
61.38
7.26
23.76
5.94
6.6
30.36
111.54
13.86
143.22
13.86
19.14
8.58
5.28
6.6
3.96
5.28
7.92
4.62
3.3
11.88
31.02
8.58
17.82
71.94
3.3
137.94
12.54
7.92
150.48
62.7
26.4
48.18
2.64
52.8
1.98
17.82
14.52
5.28
48.18
30.36
7.92
3.96
6.6
148.5
23.76
7.26
5.28
3.3
59.4
124.74
6.6
36.3
19.8
28.38
20.46

## Sheet: Figure 1 - Suppl 1
Individual lifetimes used to construct histograms
F1-S1 D	F1-S1 E	F1-S1 F	F1-S1 G	F1-S1 H
Atto 488 lifetime (s)	Atto 565 lifetime (s)	Atto 647N lifetime (s)	Pol IIIcore lifetime without DNA bleach (s)	Pol IIIcore lifetime with DNA bleach (s)
N = 142	N = 116	N = 87	N = 91	N = 45
1048.08	141.9	58.74	77.88	42.9
1331.88	1104.18	1850.64	54.78	13.2
329.34	41.58	18.48	51.48	7.92
1174.14	48.84	10.56	60.06	5.94
751.74	34.32	34.32	9.9	1.98
169.62	716.76	1302.84	47.52	1.98
221.76	1046.1	126.72	34.98	4.62
733.92	64.02	58.74	14.52	9.9
209.88	11.22	24.42	138.6	9.9
1331.88	61.38	56.76	4.62	29.7
32.34	21.12	161.7	40.26	21.12
258.72	61.38	125.4	67.98	5.94
516.12	133.98	5.94	40.26	36.96
122.1	539.88	1908.06	42.9	15.84
11.88	42.24	41.58	23.1	46.86
33	113.52	27.72	26.4	5.28
8.58	1399.2	82.5	151.8	11.22
277.2	720.06	276.54	2.64	19.14
79.86	1024.32	415.14	7.26	2.64
139.92	48.18	326.04	12.54	5.28
5.94	171.6	3300	18.48	7.92
199.98	349.14	95.04	4.62	10.56
314.16	17.82	61.38	3.96	91.74
1209.12	115.5	23.76	6.6	33
271.92	300.3	752.4	11.22	34.32
13.2	650.1	2235.42	7.26	22.44
210.54	40.26	204.6	3.96	32.34
1001.22	163.68	1803.12	19.8	8.58
532.62	49.5	866.58	123.42	2.64
1072.5	3.96	499.62	73.26	7.26
345.18	65.34	1039.5	35.64	17.16
171.6	40.92	73.26	199.32	81.84
336.6	286.44	30.36	7.26	3.96
58.08	118.8	16.5	21.78	38.28
1133.22	70.62	676.5	7.92	124.08
639.54	92.4	499.62	10.56	46.2
743.16	11.88	282.48	3.3	37.62
587.4	1399.2	19.8	34.32	8.58
298.98	25.74	283.14	3.3	9.9
20.46	369.6	81.84	44.88	28.38
146.52	846.78	3300	2.64	14.52
32.34	45.54	131.34	27.06	90.42
34.98	34.32	3300	7.92	6.6
650.76	475.2	159.72	114.18	6.6
188.1	36.3	1101.54	29.04	4.62
11.22	135.3	42.9	27.72
54.12	1021.02	1116.06	1.98
1011.12	559.68	27.72	4.62
95.7	234.96	1108.8	4.62
506.22	585.42	3300	5.94
67.98	179.52	77.22	33.66
92.4	9.9	15.84	40.92
944.46	133.32	95.7	1.98
130.02	113.52	11.22	57.42
16.5	207.24	50.16	43.56
376.2	719.4	32.34	1.98
1321.32	232.32	281.16	21.78
132	359.04	30.36	1.98
60.06	52.14	8.58	6.6
77.88	18.48	453.42	26.4
515.46	58.74	168.3	33
46.2	277.2	53.46	57.42
110.22	124.74	3300	9.24
105.6	145.2	161.7	34.98
883.74	1059.96	91.74	17.82
135.3	200.64	87.12	8.58
95.7	4.62	721.38	9.9
179.52	217.8	571.56	50.16
395.34	334.62	613.14	25.08
401.28	253.44	1829.52	1.98
40.26	504.9	161.04	11.22
126.06	275.22	1283.7	13.86
559.68	195.36	39.6	2.64
36.3	217.8	1486.32	28.38
243.54	143.22	1683.66	33.66
91.08	71.94	1910.04	5.28
102.96	130.68	80.52	13.2
635.58	6.6	220.44	4.62
1058.64	67.98	345.84	4.62
42.9	142.56	24.42	10.56
36.96	31.02	73.92	94.38
582.12	56.76	238.92	13.2
93.06	11.88	236.28	1.98
166.98	339.9	3300	25.08
209.88	166.98	31.68	3.96
646.14	43.56	1135.86	7.26
82.5	48.84	10.56	5.28
665.28	85.14		6.6
524.04	283.14		1.98
62.7	217.8		100.98
88.44	108.9		44.22
9.24	248.16
89.76	700.92
191.4	697.62
121.44	1256.64
70.62	35.64
676.5	71.94
228.36	177.54
130.02	15.84
32.34	408.54
24.42	15.84
227.7	30.36
613.14	92.4
197.34	18.48
109.56	497.64
223.08	57.42
364.32	117.48
469.92	36.96
236.94	403.26
900.24	6.6
89.1	25.08
195.36	101.64
999.24	283.8
232.98	42.24
215.82	269.28
56.76	482.46
463.32
233.64
972.84
107.58
225.72
467.94
595.98
281.16
396.66
654.06
708.18
71.28
258.06
654.72
69.3
441.54
115.5
52.14
148.5
42.9
212.52
638.88
834.24
265.32
76.56
15.84

## Sheet: Figure 2 - Suppl 1
Individual lifetimes used to construct histograms
F2-S1 G
Loader lifetime during unproductive binding (s)
N = 44
0.88
1.32
5.28
0.88
6.16
1.76
0.88
0.88
2.64
3.52
1.32
8.8
0.88
0.88
1.32
0.44
0.88
1.32
3.96
0.88
3.08
2.2
1.76
4.4
4.84
0.44
2.2
3.52
29.92
1.32
1.76
0.88
1.32
63.36
3.08
1.32
0.44
3.08
11.88
0.88
19.8
9.24
7.48
3.96

## Sheet: Figure 4 - Suppl 1
Individual lifetimes used to construct histograms
F4-S1 A	F4-S1 B	F4-S1 C	F4-S1 D	F4-S1 E	F4-S1 F	F4-S1 G	F4-S1 H
Lag time (s)	Lag time (s)	Lag time (s)	Lag time (s)	Pol IIIcore lifetime (s)	Pol IIIcore lifetime (s)	Pol IIIcore lifetime (s)	Pol IIIcore lifetime (s)
N = 35	N = 53	N = 35	N = 47	N = 35	N = 53	N = 35	N = 47
9.9	46.86	17.82	3.3	3.3	9.24	15.84	27.72
17.82	184.14	5.94	7.92	13.2	13.86	8.58	3.96
33.66	67.32	2.64	0.66	9.24	25.74	4.62	21.78
6.6	5.28	3.3	0.66	11.88	11.88	31.02	7.26
19.14	72.6	7.92	6.6	3.96	4.62	27.72	2.64
67.98	5.28	14.52	112.86	1.98	5.94	9.24	6.6
73.26	7.26	0.66	1.32	12.54	71.94	15.84	3.3
17.82	88.44	23.76	1.32	3.3	3.3	12.54	45.54
12.54	3.3	21.12	6.6	7.92	16.5	11.22	12.54
151.8	66.66	1.32	19.14	13.86	13.86	2.64	8.58
150.48	42.9	2.64	47.52	20.46	34.98	18.48	1.98
30.36	0	4.62	11.88	12.54	8.58	27.06	15.18
65.34	133.98	0.66	1.32	29.7	108.24	7.92	15.18
180.18	6.6	1.32	0.66	6.6	3.96	15.18	3.3
64.68	27.72	1.98	15.84	4.62	11.88	3.96	5.94
59.4	61.38	53.46	11.88	13.86	12.54	1.98	32.34
57.42	5.28	2.64	1.98	27.72	6.6	3.96	15.84
3.3	17.16	3.3	1.98	4.62	14.52	29.04	9.9
6.6	19.14	5.94	15.18	31.02	11.88	24.42	18.48
33.66	11.88	16.5	47.52	9.24	110.88	3.96	21.78
5.28	21.12	3.96	35.64	14.52	11.88	3.3	5.28
17.82	5.94	-0.66	1.32	6.6	3.3	2.64	7.26
5.94	1.32	3.96	22.44	15.18	7.26	79.86	14.52
13.2	192.72	3.3	0.66	20.46	9.9	81.18	50.82
114.84	56.76	5.28	3.96	20.46	2.64	84.48	32.34
1.32	93.72	5.94	20.46	4.62	29.04	127.38	13.2
2.64	59.4	5.28	1.32	8.58	33	1.98	3.3
52.8	116.82	1.98	1.32	11.88	9.9	12.54	4.62
1.98	120.12	7.26	3.96	54.12	11.88	71.94	14.52
36.3	27.06	2.64	97.68	7.26	10.56	15.18	93.72
161.7	33	1.98	2.64	2.64	69.96	36.96	16.5
58.08	7.26	11.22	11.88	56.1	46.2	9.24	48.18
23.1	3.96	6.6	5.94	42.24	21.78	9.24	3.3
24.42	5.28	0.66	5.94	5.94	14.52	30.36	21.78
37.62	5.94	16.5	17.16	13.2	5.28	102.3	10.56
	63.36		-1.32		10.56		114.18
	32.34		1.98		7.92		1.98
	0		31.02		1.32		67.32
	23.76		40.26		1.98		2.64
	32.34		0.66		141.9		31.68
	23.1		218.46		2.64		100.98
	1.32		2.64		3.96		3.96
	19.14		1.98		21.12		27.72
	17.82		12.54		8.58		7.26
	109.56		97.02		12.54		117.48
	16.5		3.96		11.88		2.64
	119.46		11.88		56.1		15.18
	9.9				5.28
	1.32				5.28
	79.2				5.94
	155.76				3.3
	64.68				31.02
	26.4				26.4

## Sheet: Figure 4 - Suppl 2
Individual lifetimes used to construct histograms
F4-S2 A	F4-S2 B	F4-S2 C	F4-S2 D	F4-S2 E
Pol IIIcore ε(β-) lifetime (s)	Pol IIIcore ε(β+) lifetime (s)	Pol IV (β groove) lifetime (s)	Pol IV (β rim) lifetime (s)	Pol II (β groove) lifetime (s)
N = 43	N = 24	N = 63	N = 74	N = 62
56.1	2.64	13.2	3.96	28.38
3.3	3.3	3.3	97.02	39.6
7.26	80.52	2.64	14.52	4.62
7.92	25.74	2.64	2.64	14.52
5.28	23.1	3.3	7.92	34.98
1.98	9.24	5.28	141.9	5.94
15.18	3.3	1.98	75.9	3.96
2.64	60.06	3.96	15.18	24.42
5.28	17.16	4.62	14.52	10.56
33	30.36	5.94	5.28	3.96
15.84	33	29.04	2.64	3.96
1.98	43.56	3.3	46.86	15.18
3.3	6.6	42.9	77.88	4.62
7.92	50.82	9.24	100.98	43.56
48.84	11.88	3.3	8.58	18.48
19.8	33.66	2.64	1.98	9.9
3.96	39.6	5.28	21.12	5.28
16.5	83.16	7.92	9.9	34.98
6.6	14.52	7.26	20.46	8.58
5.94	130.68	3.3	3.3	3.3
8.58	27.06	2.64	2.64	4.62
3.96	84.48	7.92	32.34	17.16
10.56	31.02	7.92	77.88	3.3
23.76	5.28	10.56	116.16	3.96
10.56		3.96	33	2.64
20.46		4.62	79.2	36.3
3.3		3.3	2.64	38.94
15.84		1.98	38.28	2.64
14.52		1.98	7.26	6.6
13.2		5.28	20.46	4.62
6.6		4.62	71.28	25.74
9.24		5.94	5.28	19.8
52.8		11.22	11.88	25.74
2.64		5.94	17.16	1.98
11.88		58.74	5.94	4.62
7.92		1.98	17.16	2.64
5.28		4.62	5.94	4.62
42.24		3.3	19.8	17.16
16.5		2.64	7.26	1.98
58.08		1.32	3.3	54.78
53.46		4.62	21.78	14.52
4.62		9.24	46.2	4.62
5.28		21.12	54.78	3.96
		3.3	7.26	4.62
		3.96	50.82	31.68
		3.3	5.94	17.82
		3.3	1.98	9.24
		2.64	8.58	1.98
		40.92	1.98	124.08
		3.3	7.92	5.94
		2.64	11.88	7.92
		10.56	6.6	2.64
		7.26	1.98	3.3
		6.6	4.62	2.64
		4.62	2.64	11.88
		3.3	2.64	27.06
		1.98	39.6	19.8
		4.62	3.96	17.82
		3.3	23.76	1.98
		2.64	4.62	23.1
		2.64	64.02	3.96
		3.96	7.92	1.98
		4.62	17.16
			14.52
			123.42
			45.54
			42.9
			3.3
			20.46
			54.78
			48.84
			27.06
			20.46
			118.8

## Sheet: Figure 4 - Suppl 3
Individual lifetimes used to construct histograms
F4-S3 A	F4-S3 B	F4-S3 C	F4-S3 D	F4-S3 E	F4-S3 F
Pol IIIcore lifetime (s) Matched	Pol IIIcore lifetime (s) Lesion	Pol IIIcore lifetime (s) Mismatched	Pol IIIcore lifetime (s) Matched + dATP/dTTP	Pol IIIcore lifetime (s) Lesion + dATP/dTTP	Pol IIIcore lifetime (s) Mismatched + dATP/dTTP
N = 53	N = 105	N = 98	N = 43	N = 87	N = 82
9.24	73.26	39.6	5.94	54.78	3.3
13.86	41.58	29.04	14.52	56.76	8.58
25.74	149.82	99	33.66	1.98	75.24
11.88	9.24	17.82	12.54	6.6	15.18
4.62	10.56	28.38	7.26	9.24	8.58
5.94	9.24	10.56	20.46	25.08	25.74
71.94	13.86	117.48	8.58	14.52	6.6
3.3	9.9	13.2	5.94	12.54	4.62
16.5	29.7	6.6	26.4	3.3	31.68
13.86	32.34	5.94	11.22	10.56	10.56
34.98	6.6	42.9	2.64	9.9	3.96
8.58	7.92	19.8	5.94	14.52	28.38
108.24	116.16	2.64	4.62	3.96	11.22
3.96	61.38	5.28	15.84	38.28	4.62
11.88	19.14	14.52	11.88	34.32	15.18
12.54	12.54	35.64	25.74	5.28	27.72
6.6	5.28	9.9	50.82	3.3	19.14
14.52	61.38	4.62	11.22	4.62	25.08
11.88	2.64	17.16	27.06	13.2	34.98
110.88	3.96	3.3	9.24	40.92	26.4
11.88	19.8	1.98	29.7	46.86	27.06
3.3	5.94	1.98	2.64	30.36	11.88
7.26	5.28	15.84	67.98	4.62	11.88
9.9	31.02	57.42	5.94	23.76	23.1
2.64	9.24	1.98	9.9	30.36	15.84
29.04	25.08	9.24	2.64	13.2	7.26
33	56.76	1.98	5.94	2.64	2.64
9.9	3.96	20.46	13.2	14.52	39.6
11.88	36.3	93.06	9.9	15.84	2.64
10.56	43.56	15.84	13.2	9.9	3.3
69.96	147.84	99.66	35.64	72.6	6.6
46.2	3.96	62.7	17.82	67.98	3.3
21.78	14.52	5.28	3.3	80.52	13.2
14.52	73.92	42.24	3.3	7.26	3.96
5.28	13.2	103.62	9.9	3.3	7.92
10.56	17.16	10.56	14.52	54.78	2.64
7.92	3.3	15.18	128.04	4.62	19.14
1.32	56.1	15.84	40.92	9.9	83.16
1.98	9.9	18.48	19.14	6.6	45.54
141.9	50.82	23.76	7.92	29.04	19.14
2.64	33	3.3	4.62	7.26	30.36
3.96	5.94	7.26	62.04	83.82	75.9
21.12	42.24	98.34	18.48	25.74	11.88
8.58	11.88	20.46		2.64	3.96
12.54	135.96	32.34		36.96	7.92
11.88	7.26	79.2		18.48	7.26
56.1	9.24	5.94		12.54	5.28
5.28	7.92	27.72		6.6	5.28
5.28	5.28	11.22		45.54	5.94
5.94	14.52	12.54		14.52	13.86
3.3	3.96	15.84		27.72	7.92
31.02	3.3	40.92		6.6	51.48
26.4	8.58	23.1		7.92	34.32
	5.28	9.24		50.82	9.9
	2.64	18.48		4.62	17.16
	73.92	65.34		5.28	7.92
	32.34	6.6		9.24	3.96
	11.88	10.56		11.88	50.82
	7.26	152.46		5.94	4.62
	28.38	2.64		7.26	55.44
	13.2	1.98		3.96	3.96
	12.54	11.88		14.52	27.72
	33	52.8		15.84	19.8
	10.56	25.74		20.46	16.5
	40.92	34.98		6.6	49.5
	5.94	27.72		3.3	4.62
	5.94	21.12		14.52	17.16
	13.86	2.64		12.54	3.96
	174.9	21.78		56.1	23.76
	62.04	4.62		33	67.98
	30.36	23.1		28.38	11.22
	46.86	17.82		50.82	26.4
	5.94	1.98		4.62	17.16
	48.84	2.64		5.94	3.3
	1.98	21.12		13.86	13.2
	11.88	62.04		20.46	9.9
	32.34	17.16		5.28	38.94
	26.4	14.52		6.6	7.26
	4.62	9.9		43.56	9.9
	5.94	5.94		145.86	17.16
	7.92	154.44		13.86	24.42
	106.92	12.54		4.62	5.94
	43.56	19.8		4.62
	1.98	3.96		50.16
	2.64	71.28		13.86
	40.92	7.92		58.74
	19.14	5.94		4.62
	9.9	57.42
	34.32	82.5
	5.28	6.6
	6.6	231
	40.26	2.64
	41.58	134.64
	17.82	3.3
	9.24	100.32
	3.96	7.92
	29.7	3.3
	51.48	9.24
	75.9
	16.5
	8.58
	21.78
	142.56
	26.4
	44.88
